# Supplementary material
Source: Springer Nature journal article supplement (https://www.springermedizin.de/resource/supplementary/13256_2012_2493_MOESM3_ESM.pdf/9650362)
Supplement: MOESM3 [file 9650362]

2811980  
00841409  
/1980

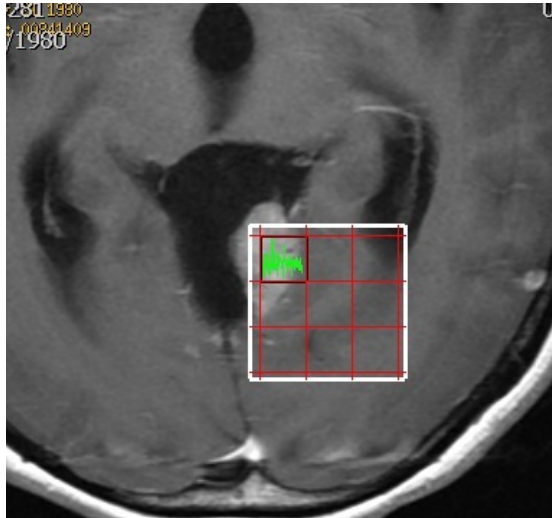

UC:00841409

848281  
/21/1980  
400  
300  
200  
100  
0  
-100

Comp : 14310  
Ch : 2277  
Cr : 429  
NAA : 984  
Cr+Ch : 2520  
Ch/Cr : N/A  
Ch/NAA : N/A  
NAA/Ch : 0.430  
NAA/Cr : N/A  
Cr/NAA : N/A  
LL : 2240  
MI : 880  
SNR : N/A  
Alanine : 711

Ch

Cr

Cr

NAA

Ala

LL

MEDICAL SYSTEMS T  
sat Perubatan UM

SPECTROSCOPY - BF

4.30 3.71 3.09 2.48 1.87 1.25 SCREEN

03/2  
17
